# Supplementary material for: Characterization of the Expression of Angiogenic Factors in Cutaneous Squamous Cell Carcinoma of Domestic Cats
Source: MDPI journal article supplement (doi:10.3390/vetsci9070375), 2022-07-21
Supplement: s1 [file s1]

**Supplemental Table S1: Primers and probes used for qRT-PCR**

| Target                                                  | Name    | Strand | Sequence (5'-3')                  |
|---------------------------------------------------------|---------|--------|-----------------------------------|
| <b><i>PanVEGF A</i></b><br>(exons 3/4)                  | BH-745  | S      | CCCACGGAGGAGTTCAACAT              |
|                                                         | BH-746  | AS     | TGGCCTTGATGAGGTTTGATC             |
|                                                         | BHTP-33 | P      | FAM-ACCATGCAGATTATGC-NFPMGB       |
| <b><i>VEGF-A<sub>119</sub></i></b><br>(exons 4/5/8)     | BH-790  | S      | ATGTGAATGCAGACCAAAGAAAGA          |
|                                                         | BH-791  | AS     | CACCGCCTGGGCTTGT                  |
|                                                         | BHTP-39 | P      | FAM-AGCGAAAGAAAAATGTGACAAG-NFPMGB |
| <b><i>VEGF-A<sub>163</sub></i></b><br>(exons 4/5/7a/7b) | BH-711  | S      | AGCAAATGTGAATGCAGACCAA            |
|                                                         | BH-712  | AS     | TGCAAGTACGTTTCGTTTAACTCAAG        |
|                                                         | BHTP-31 | P      | 6FAM-AAAGAAAATCCCTGTGGGC-MGBNFQ   |
| <b><i>VEGF-A<sub>181</sub></i></b><br>(exons 6s/7)      | BH-713  | S      | AATCAGTTCGAGGAAAGGGAAAG           |
|                                                         | BH-714  | AS     | TGCGGATCTTGTACAAACAAATG           |
|                                                         | BHTP-32 | P      | VIC-CAAGAAATCCCGTCCCTGT-MGBNFQ    |
| <b><i>PLGF I</i></b><br>(exons 4/5/6)                   | BH-676  | S      | TCCTACGTGGAGCTGACATTCTC           |
|                                                         | BH-674  | AS     | CCCTTGGGTCTCCTCCTTTC              |
|                                                         | BHTP-27 | P      | FAM-CAGAAAGGAGGAGACCCA-MGB        |
| <b><i>PLGF II</i></b><br>(exons 4/5/7)                  | BH-676  | S      | TCCTACGTGGAGCTGACATTCTC           |
|                                                         | BH-679  | AS     | GTGGGGGTTGTCTCTCTTCTGA            |
|                                                         | BHTP-28 | P      | VIC-AGAAAGGTGCGGCAAT-MGB          |
| <b><i>Flt-1</i></b><br>(exons 14/15)                    | BH-792  | S      | GGTTTAAAAACAACCACCAAATACAG        |
|                                                         | BH-793  | AS     | TGCTGCTTCCCGGTCCTA                |
|                                                         | BHTP-40 | P      | FAM-AACCCGGAATTATC-NFPMGB         |
| <b><i>sFlt-1</i></b><br>(exon 13/intron 13)             | BH-794  | S      | CTGCAGAGCCAGGAACATATACA           |
|                                                         | BH-795  | AS     | GATCCGAGAGAAAACAGCCTTTT           |
|                                                         | BHTP-41 | P      | FAM-ACAATTAGAGGTGAGCACTG-NFPMGB   |
| <b><i>KDR</i></b><br>(exons 3/4)                        | BH-751  | S      | CGTAGCCTCGGTCATTTATGTCT           |
|                                                         | BH-752  | AS     | TGTTGGTCGCTAACAGAAGCA             |
|                                                         | BHTP-36 | P      | FAM-TGTTCAAGATTACAGGTCTC-NFPMGB   |

S, Sense primer; AS, Anti-sense primer; P, Fluorogenic TaqMan probe
